# Supplementary material for: Insufficient oxygen diffusion leads to distortions of microbial growth parameters assessed by isothermal microcalorimetry
Source: Royal Society of Chemistry journal article supplement (doi:10.1039/c4ra03921a), 2014-01-01
Supplement: c4ra03921a1.pdf [file c4ra03921a1.pdf]

1 **Supplementary material to**

2  
3 **Insufficient oxygen diffusion leads to distortions of microbial growth**  
4 **parameters assessed by isothermal microcalorimetry**

5 Thomas Maskow<sup>1</sup>, Frida Mariana Morais<sup>1</sup>, Luis F. M. Rosa<sup>1</sup>, Qian Yi Guang<sup>1,2</sup>, Falk  
6 Harnisch<sup>1</sup>

7  
8 <sup>1</sup>UFZ - Helmholtz Centre for Environmental Research, Department of Environmental Microbiology,  
9 Permoserstr. 15, 04318 Leipzig, Germany

10 <sup>2</sup> School of Environmental Studies & Key Laboratory of Biogeology and Environmental Geology of  
11 Chinese Ministry of Education & Sino-Hungarian Joint Laboratory of Environmental Science and  
12 Health, China University of Geosciences, 430074 Wuhan, PR China

13  
14 **Corresponding author:** Thomas Maskow

15 **E-mail:** [Thomas.maskow@ufz.de](mailto:Thomas.maskow@ufz.de)

16 **Phone:** +49 341 235 1328

17 **Fax:** +49 341 235 1351

18  
19  
20  
21 **Number of pages:** 4

22 **Number of figures:** 2

23 **Number of tables:** 0

## 24 1. General applicable $Y_{O/B}$

25 In the main paper the ratio of mole oxygen consumed per mole biomass formed  $Y_{O/B}$  is of  
 26 crucial importance to simulate the influence of oxygen bioavailability on calorimetric signals.  
 27 Bacterial growth on any carbon substrate with the composition of  $CH_{SH}O_{SO}$  can be described  
 28 by a simple stoichiometric equation (S1).

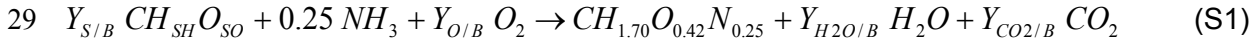

30  $Y_{i/B}$  are yield coefficients describing the number of moles of the substances  $i$  consumed  
 31 (negative sign) or formed (positive sign) per one mole of formed biomass.  $SH$ ,  $SO$  describe  
 32 the number of hydrogen and oxygen atoms per carbon atom in the carbon-substrate  
 33 molecule  $CH_{SH}O_{SO}$ .  $CH_{1.70}O_{0.42}N_{0.25}$  is a general equation describing bacterial biomass <sup>1</sup>. The  
 34 yield coefficients are not independent on each other, as they have to fulfill the elementary  
 35 balances. Taking this into consideration,  $Y_{O/B}$  depends only on  $Y_{S/B}$  (eq. S2).

$$36 Y_{O/B} = Y_{S/B} \left( \frac{SH}{4} - \frac{SO}{2} + 1 \right) - 1.0275 \quad (S2)$$

37  $Y_{S/B}$  is determined by the energy content of the substrate <sup>2-5</sup>, which in turn depends on the  
 38 relative degree of reduction of the substrate  $\gamma_S$  <sup>6</sup>. Equation S3 describes the simplest  
 39 relation between  $\gamma_S$  and  $Y_{S/B}$  <sup>7</sup>.

$$40 \begin{aligned} Y_{S/B} &= \frac{7.69}{\gamma_S} \quad \text{if } \gamma_S \leq 4.67 \\ Y_{S/B} &= 1.67 \quad \text{if } \gamma_S > 4.67 \end{aligned} \quad \text{with } \gamma_S = 4 + SH - 2 SO \quad (S3)$$

41 A general valid  $Y_{O/B}$  can be obtained (eq. S4) by combining eqs. S2 and S3:

$$42 \begin{aligned} Y_{O/B} &= 0.897 \quad \text{if } \gamma_S \leq 4.67 \\ Y_{O/B} &= 0.417 SH - 0.835 SO + 0.642 \quad \text{if } \gamma_S > 4.67 \end{aligned} \quad (S4)$$

43 This means that  $Y_{O/B}$  is independent on the carbon-substrate and the considered strain for all  
 44 carbon-substrates with  $\gamma_S \leq 4.67$ . This holds true for carbohydrates, 70% of amino acids,  
 45 many proteins, many organic acids etc. The most calorimetric measurements discussed in  
 46 the main paper follow growth on carbon-substrates with  $\gamma_S \leq 4.67$ . Thus, it is justified to apply  
 47  $Y_{O/B} = 0.897$  for simulating and discussing the influence of oxygen bioavailability on  
 48 calorimetric measurements in closed ampoules. Note, for degradation experiments of PHAs'  
 49 of oil contaminants or growth experiments on simple alcohols or  $CH_4$  the second case  
 50  $Y_{O/B} = 0.417 SH - 0.835 SO + 0.642$  has to be considered.

51 **2. Analytical solutions of the oxygen balance**

52 The bacterial oxygen consumption rate can be described by Monod-type kinetics (eq. S5)

53 
$$R_O = Y_{O/B} B \mu_{\max} \frac{O}{k_0 + O} \tag{S5}$$

54  $R_O$ ,  $Y_{O/B}$ ,  $\mu_{\max}$ ,  $k_0$ ,  $O$  are the oxygen consumption rate, yield coefficient, maximum specific  
 55 growth rate, half saturation constant and oxygen concentration, respectively. The oxygen  
 56 consumption rate becomes independent of the oxygen concentration and therefore of oxygen  
 57 diffusion, if  $k_0$  approaches to very small values ( $k_0 \ll O$ ). As a consequence, the respiratory  
 58 bacterial growth is independent of oxygen diffusion. The test of this hypothesis using  
 59 numerical solutions of mathematical models describing the oxygen balance often fails due to  
 60 the very small values of  $k_0$  in comparison to  $O$ . Analytical solutions of the mass balance  
 61 equation could potentially overcome that limitation.

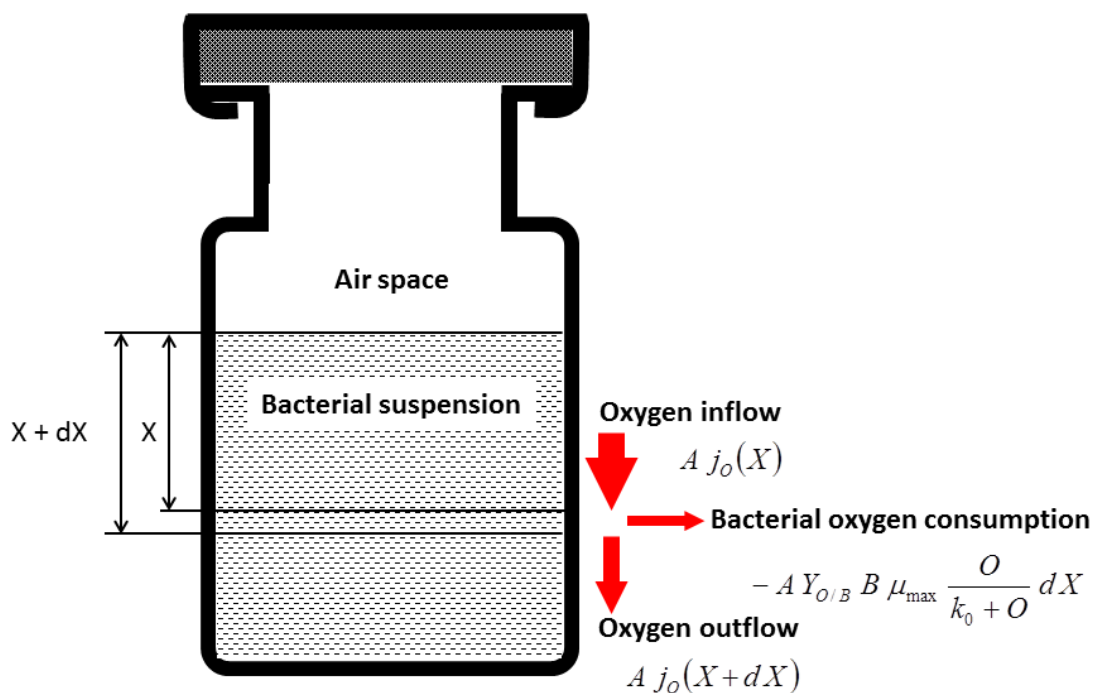

62

63 Figure S1: Oxygen balance for a slice of infinite small thickness  $dX$  in the depth of  $X$  in a  
 64 calorimetric ampoule.

65 Figure S1 illustrates the oxygen balance for a slice of infinite small thickness. Eq. S6 is the  
 66 mathematical description of this oxygen balance.

$$67 \quad \dot{R}_O = A \left( j_o(X) - j_o(X+dX) + Y_{O/B} B \mu_{\max} \frac{O}{k_o + O} dX \right) \quad \text{with} \quad j_o = -D \frac{dO}{dX} \quad (\text{S6})$$

68  $\dot{R}_O$ ,  $A$ ,  $j_o$ ,  $D$  are the oxygen accumulation, the oxygen exchanging surface of the slice, the  
 69 oxygen flow, and the diffusion constant, respectively.  $\dot{R}_O = 0$  can be assumed at steady state  
 70 and eq. S3 results.

$$71 \quad \frac{\partial^2 O}{\partial X^2} = \frac{Y_{O/B} B \mu_{\max}}{D} \frac{O}{k_o + O} \quad (\text{S7})$$

72 This equation can be integrated analytically providing eq. S8.

$$73 \quad X = \sqrt{\frac{2D}{Y_{O/B} B \mu_{\max}} \left( k_o \ln\left(\frac{O}{O_o}\right) + O - O_o \right)} \quad (\text{S8})$$

74  $O_o$  is the oxygen concentration in liquid phase at the surface between the bacterial  
 75 suspension and the air containing head space in the vial ( $X=0$ ). This equation will be applied  
 76 in the main paper to estimate the influence of  $k_o$  on the heat signal. Figure S2 illustrates the  
 77 influence of the oxygen affinity on the oxygen profile.

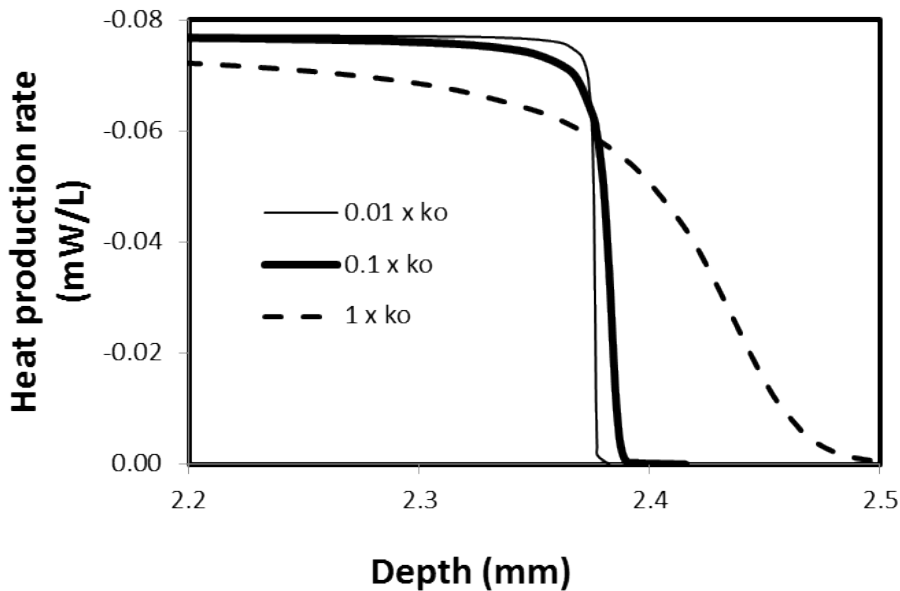

78

79 Figure S2: Influence of the oxygen half saturation ( $k_o$ ) on the heat production rate ( $B = 3.55$   
 80  $\text{mol m}^{-3}$ ,  $O_o = 0.206 \text{ mol m}^{-3}$ ,  $Y_{O/B} = 0.897 \text{ mol mol}^{-1}$ ,  $k_o = 2.37 \times 10^{-3} \text{ mol m}^{-3}$ ,  
 81  $\mu_{\text{MAX}} = 0.19 \text{ h}^{-1}$ )

82

### 83 References

- 84 1. J. L. Cordier, B. M. Butsch, B. Birou and U. Stockar, *Appl. Microbiol. Biotechnol.*, 1987, **25**,  
85 305-312.
- 86 2. J. Roels, *Biotechnol. Bioeng.*, 1980, **22**, 2457-2514.
- 87 3. J. J. Heijnen, in *Encyclopedia of Bioprocess technology: fermentation, biocatalysis,*  
88 *bioseparation*, eds. M. C. Flickinger and S. W. Drew, John Wiley & Sons, Inc., 1999, pp. 267 -  
89 291.
- 90 4. P. L. McCarty, *Biotechnol. Bioeng.*, 2007, **97**, 377-388.
- 91 5. U. von Stockar, V. Vojinovic, T. Maskow and J. Liu, *Chem. Eng. Proc.*, 2008, **47**, 980-990.
- 92 6. S. I. Sandler and H. Orbey, *Biotechnol. Bioeng.*, 1991, **38**, 697-718.
- 93 7. J. S. Liu, V. Vojinović, R. Patiño, T. Maskow and U. von Stockar, *Thermochim. Acta*, 2007, **458**,  
94 38-46.

95

96
